# Supplementary material for: A strategy for the identification of protein architectures directly from ion mobility mass spectrometry data reveals stabilizing subunit interactions in light harvesting complexes
Source: PubMed Central journal article supplement — Protein Sci. 2019 Apr 19;28(6):1024–30. doi: 10.1002/pro.3609 (PMC6511732; doi:10.1002/pro.3609), 2019-04-19
Supplement: PRO-28-1024-s001.pdf [file PRO-28-1024-s001.pdf]

Supplementary Information to

# A strategy for the identification of protein architectures directly from ion mobility mass spectrometry data reveals stabilizing subunit interactions in light harvesting complexes

Margit Kaldmäe, Cagla Sahin, Mihkel Saluri, Erik G. Marklund, and Michael Landreh

**Table S1.** Masses for PE and PC complexes and dissociation products. Standard deviations indicate the mass error between charge states. Predicted masses are based on the experimentally determined masses for  $\alpha$ - and  $\beta$ -subunits.

| Complex                                            | Measured Mass (Da) | Standard Deviation (Da) | Predicted Mass (Da) |
|----------------------------------------------------|--------------------|-------------------------|---------------------|
| <b>PE</b>                                          |                    |                         |                     |
| $\alpha$                                           | 18 861             | 1.2                     |                     |
| $\beta$                                            | 20 186             | 1.2                     |                     |
| $\gamma'$                                          | 27 - 28 kDa        |                         |                     |
| $\gamma''$                                         | 31 – 32 kDa        |                         |                     |
| $\alpha_6\beta_6\gamma'$                           | 262 279            | 65                      |                     |
| $\alpha_6\beta_6\gamma''$                          | 265 964            | 108                     |                     |
| $\alpha_6\beta_5\gamma'$                           | 241749             | 92                      | 242 093             |
| $\alpha_6\beta_5\gamma''$                          | 244 654            | 50                      | 245 778             |
| $\alpha_5\beta_6\gamma'$                           | 242 886            | 50                      | 243 418             |
| $\alpha_5\beta_6\gamma''$                          | 246 004            | 45                      | 245 778             |
| $\alpha_6\beta_4\gamma'$                           | 221 059            | 88                      | 221 907             |
| $\alpha_4\beta_6\gamma' / \alpha_6\beta_4\gamma''$ | 223 716            | 44                      | 224 557 / 225 592   |
| $\alpha_4\beta_6\gamma''$                          | 226 791            | 89                      | 228 242             |
| $\alpha_5\beta_5\gamma'$                           | 222 418            | 113                     | 223 232             |
| $\alpha_5\beta_5\gamma''$                          | 225 553            | 51                      | 226 917             |
| <b>PC</b>                                          |                    |                         |                     |
| $\alpha$                                           | 18 151             | 1.2                     |                     |
| $\beta$                                            | 19 240             | 1.0                     |                     |
| $\gamma$                                           | 33 -34 kDa         |                         |                     |
| $\alpha\beta$                                      | 37526              | 52                      | 37 391              |
| $\alpha_3\beta_3$                                  | 112 456            | 48                      | 112 173             |
| $\alpha_6\beta_6$                                  | 225 280            | 79                      | 224 346             |
| $\alpha_6\beta_6\gamma$                            | 259 135            | 159                     |                     |
| $\alpha_5\beta_6$                                  | 206 901            | 65                      | 206 195             |
| <b>APC</b>                                         |                    |                         |                     |
| $\alpha$                                           | 17 938             | 5.2                     |                     |
| $\beta$                                            | 17 817             | 2.6                     |                     |
| $\alpha_3\beta_3$                                  | 109 495            | 91                      | 107 265             |
| $\alpha_2\beta_3$                                  | 89 888             | 11                      | 89 448              |
| $\alpha_2\beta_2$                                  | 71 913             | 86                      | 71 510              |

**Table S2.** CCS values for PE and PC complexes.

| Complex                      | Charge state | CCS ( $\text{\AA}^2$ ) |
|------------------------------|--------------|------------------------|
| $\alpha_6\beta_6\gamma'$ PE  | 35           | 11 353                 |
|                              | 36           | 11 299                 |
|                              | 37           | 11 289                 |
|                              | 38           | 11 301                 |
| $\alpha_6\beta_6\gamma''$ PE | 35           | 11 476                 |
|                              | 36           | 11 462                 |
|                              | 37           | 11 418                 |
|                              | 38           | 11 433                 |
| $\alpha_6\beta_6\gamma$ PC   | 35           | 11 298                 |
|                              | 36           | 11 368                 |
|                              | 37           | 11 382                 |
|                              | 38           | 11 393                 |
| $\alpha_6\beta_6$ PC         | 34           | 10 047                 |
|                              | 35           | 10 363                 |
|                              | 36           | 10 491                 |
|                              | 37           | 10 619                 |

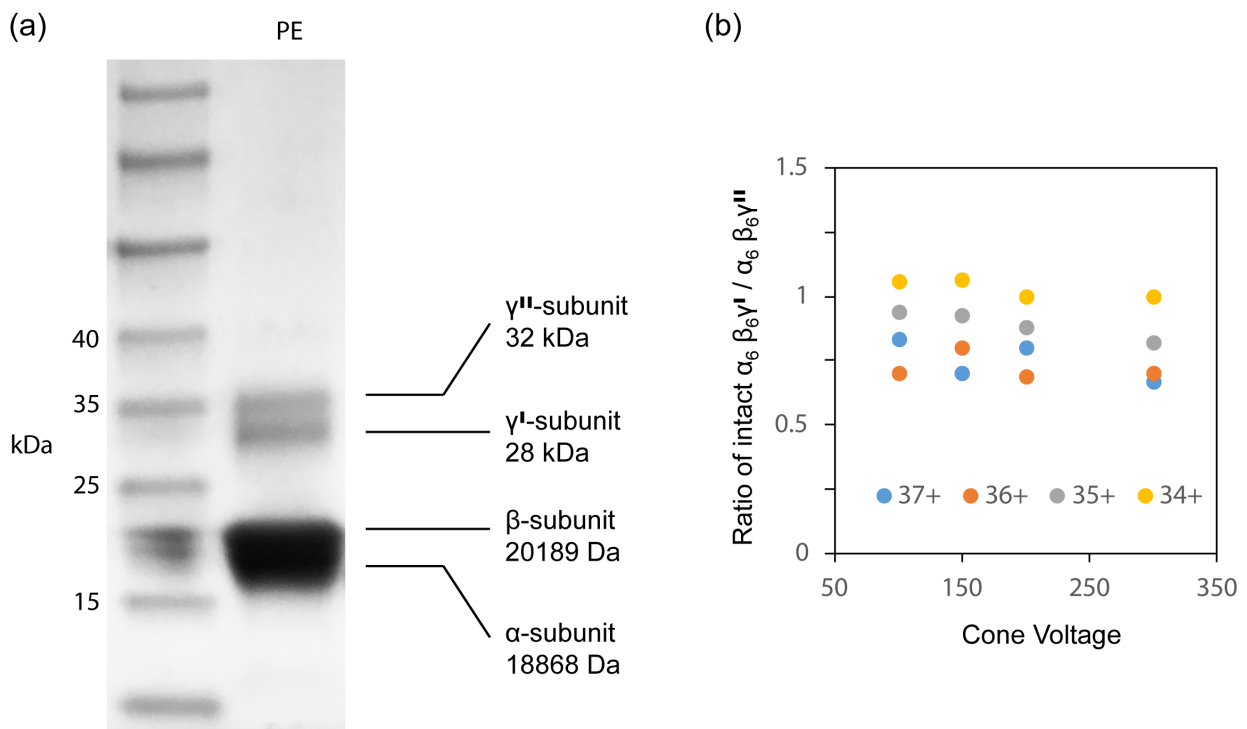

**Figure S1. (a)** SDS-PAGE analysis of PE shows the presence of two linker proteins ( $\gamma'$  and  $\gamma''$ ) which differ by less than 5 kDa. The indicated masses were calculated from the intact PE complexes (Table S1). **(b)** Comparison of the ratio of intact  $\alpha_6\beta_6\gamma'$  and  $\alpha_6\beta_6\gamma''$  PE for each charge state at each cone voltage shows similar gas-phase stabilities for both complexes.

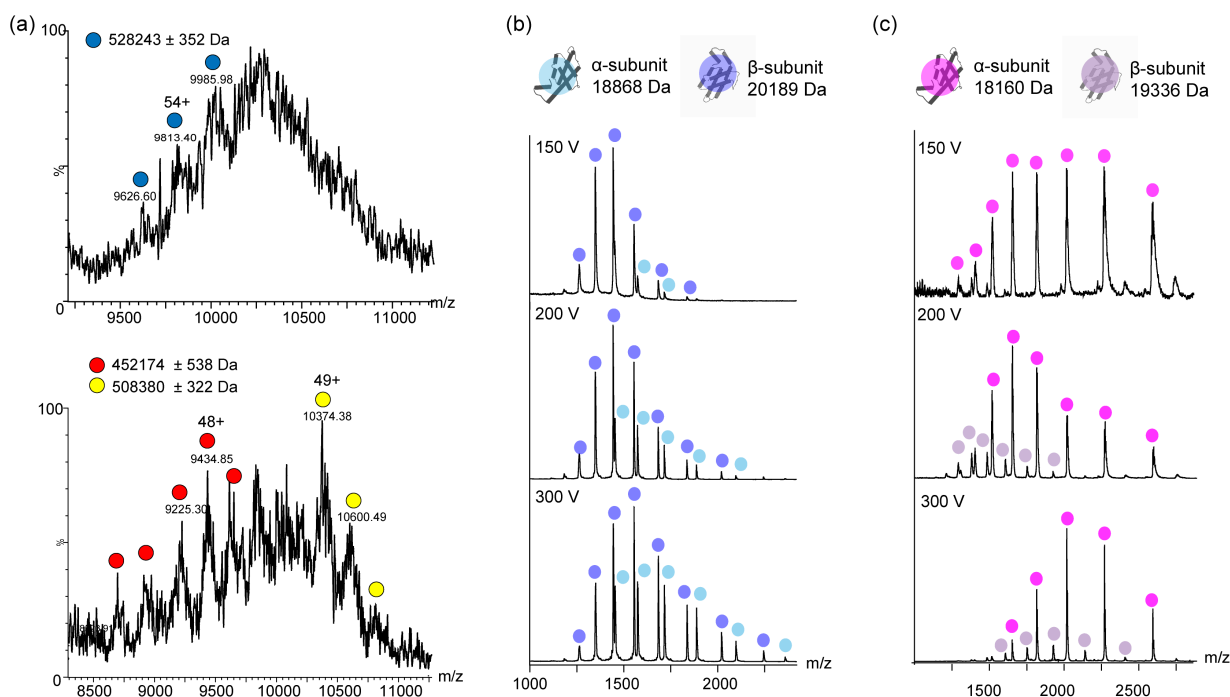

**Figure S2.** PE and PC complexes form dimers and release different subunits. **(a)** Top: The enlarged high  $m/z$  region of the spectrum in Fig. 1a shows peaks indicating complexes of approximately 530 kDa in size (blue dots). Bottom: Zoom in the high  $m/z$  region of the spectrum in Fig. 1b reveals the presence of two distinct dimeric PC complexes corresponding in mass to two  $\alpha_6\beta_6$  (red dots) or two  $\alpha_6\beta_6\gamma$  complexes (yellow dots). **(b)** Zoom of the low  $m/z$  region of the spectra in Fig. 1a indicates sequential release of  $\beta$ - and then  $\alpha$ -subunits (bright and dark pink, respectively). **(c)** Zoom of the low  $m/z$  region of the spectra in Fig. 1b shows predominant release of  $\alpha$ -subunits over  $\beta$ -subunits (bright and dark blue, respectively) in response to collisional dissociation.

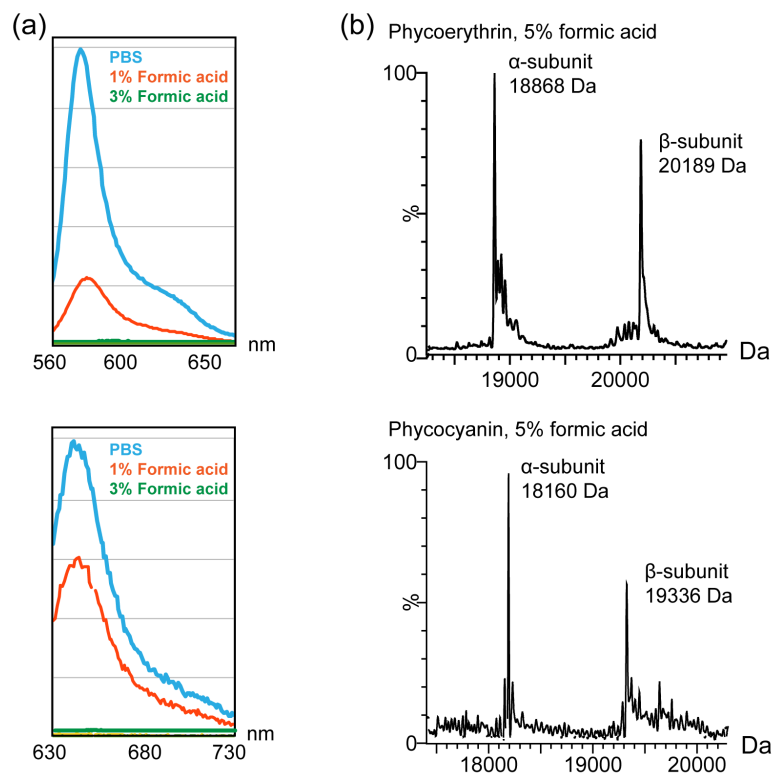

**Figure S3. (a)** Fluorescence spectroscopy was used to monitor acid-induced dissociation of PE and PC. **(b)** MS spectra of the completely dissociated complexes show that  $\alpha$ - and  $\beta$ -subunits of PE and PC give similar MS responses.

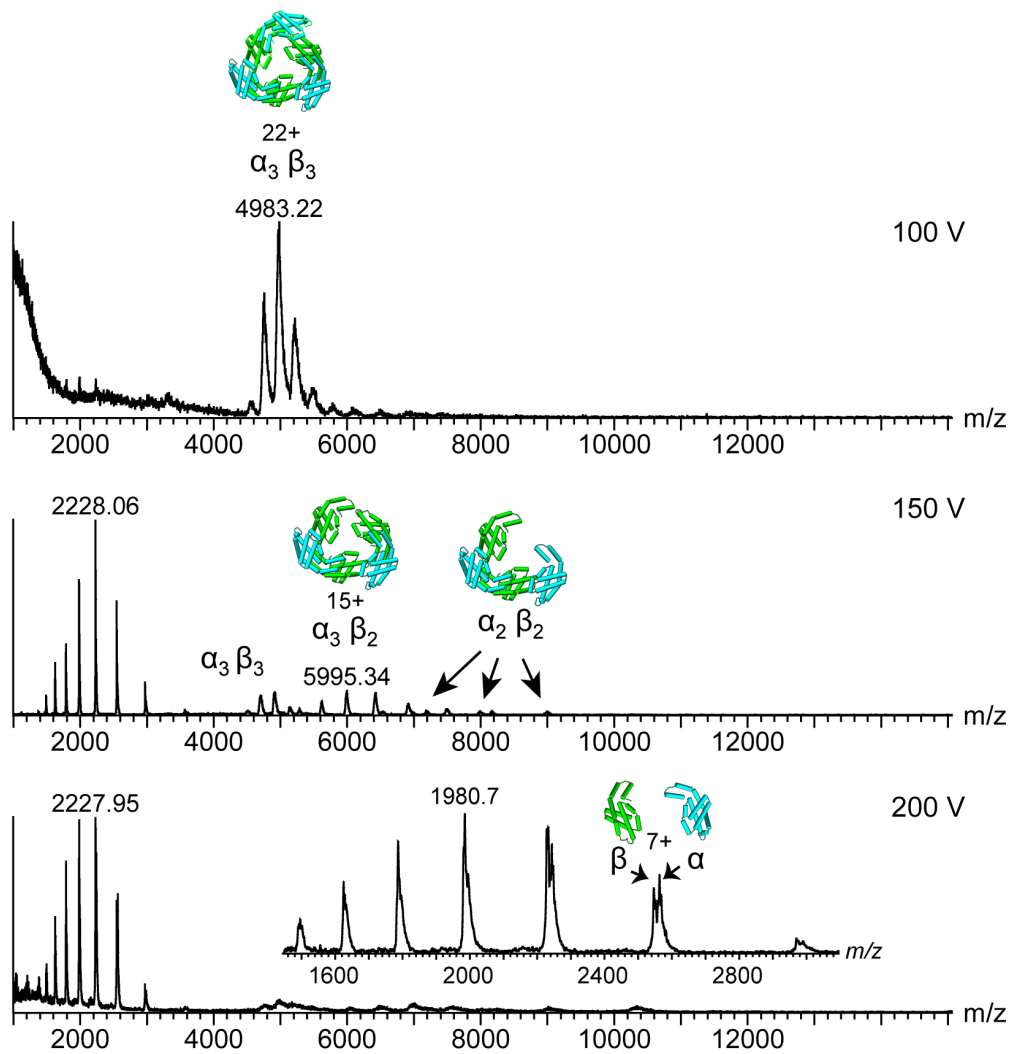

**Figure S4.** Intact mass analysis and gas-phase dissociation of APC. Using gentle ionization conditions, a homogeneous population of intact APC hetero-hexamers with no additional components can be detected. Raising the cone voltage to induce gas-phase dissociation releases individual  $\alpha$ - and  $\beta$ -subunits (insert).

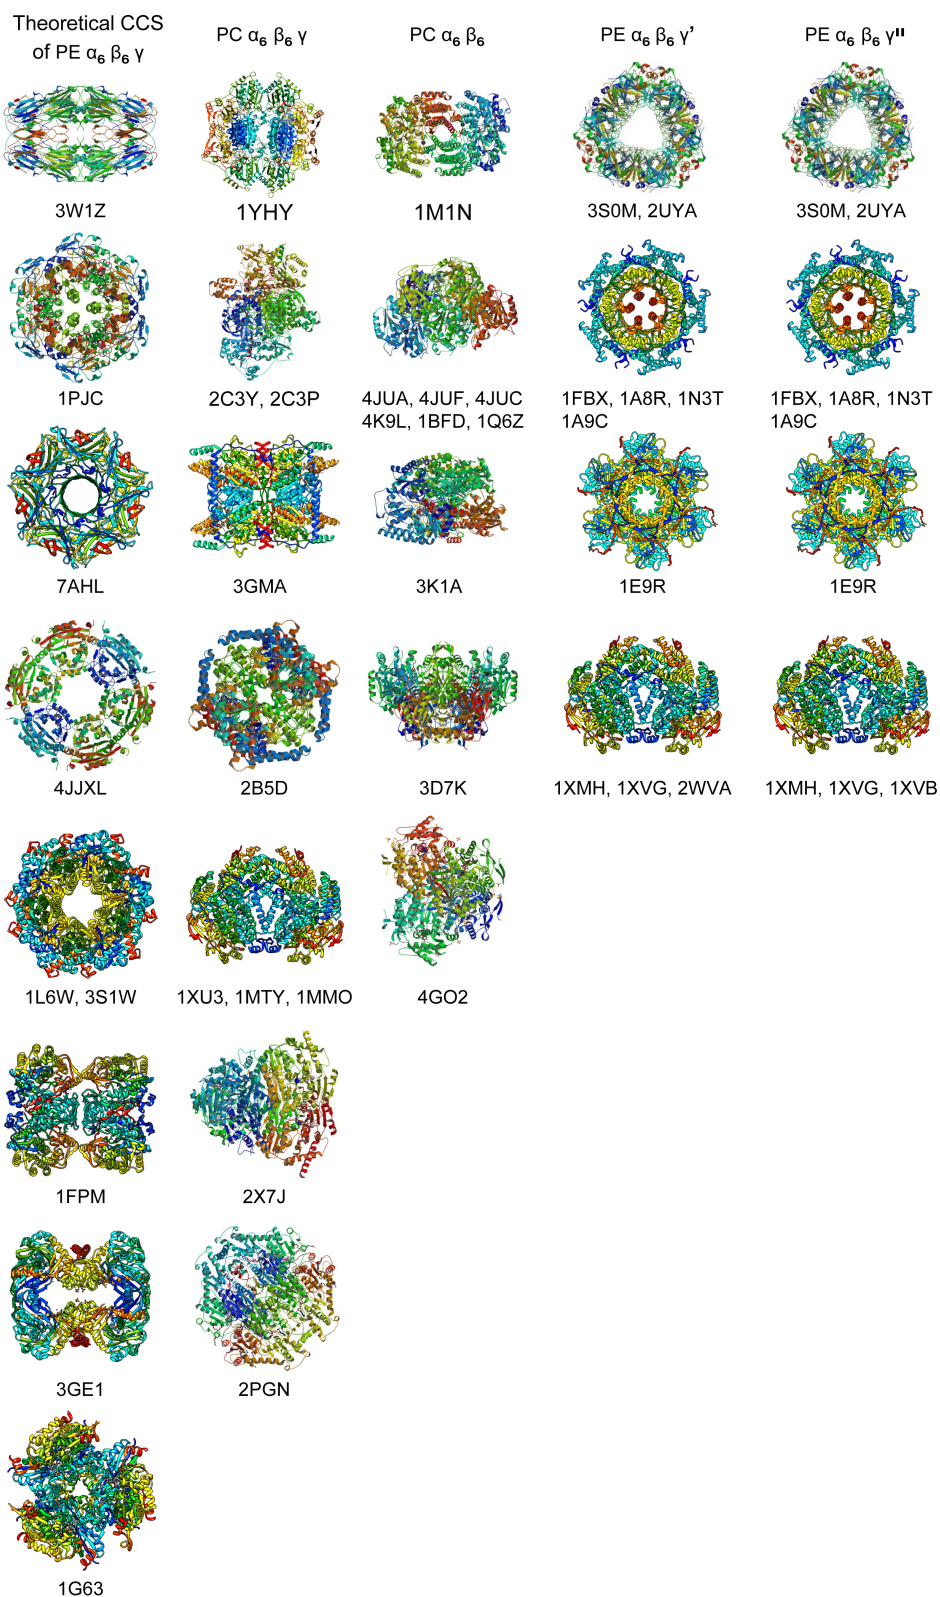

**Figure S5.** Top ten structural neighbours of the different PE and PC complexes identified by the PDB search. First column, matches for the theoretical CCS and MW of  $\alpha_6\beta_6\gamma$  PE. Second column, matches for the experimental CCS and MW of  $\alpha_6\beta_6\gamma$  PC. Third column, matches for  $\alpha_6\beta_6$  PC. Fourth and fifth column, matches for  $\alpha_6\beta_6\gamma'$  and  $\alpha_6\beta_6\gamma''$  PE.
